# Supplementary material for: Characterization of the salivary microbiome in people with obesity
Source: PubMed Central journal article supplement (PMC5858547; doi:10.7717/peerj.4458), 2018-03-16
Supplement: peerj-06-4458-s002.pdf [file peerj-06-4458-s002.pdf]

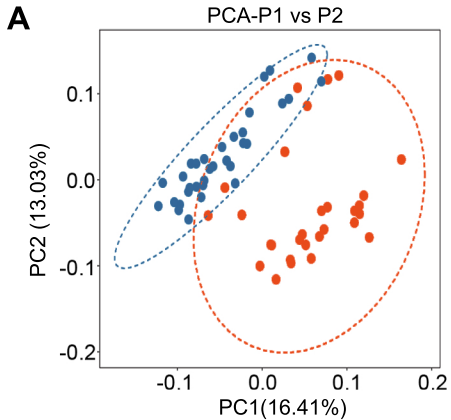

$p=0.001$  by PERMANOVA

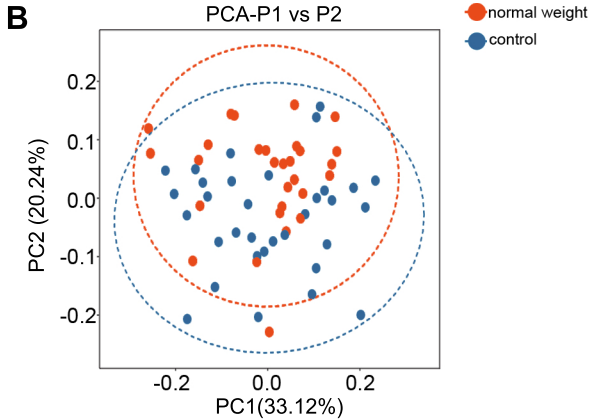

$p=0.014$  by PERMANOVA
